# Supplementary material for: A Machine Learning-Based Model for Predicting Rhabdomyolysis in Patients With Sepsis
Source: Research Square preprint supplement (doi:10.21203/rs.3.rs-7904814/v1), 2025-12-10
Supplement: Supplementary file 1 [file 8155da097d7f1591be20f514.docx]

最佳决策树模型参数组合: {'ccp_alpha': 0.0, 'max_depth': 5, 'max_features': None, 'min_samples_split': 20}

最佳RF模型参数组合: n_estimators = 200 , max_features = 2

最佳XGBoost参数组合: {'learning_rate': 0.1, 'max_depth': 3, 'n_estimators': 50, 'subsample': 0.8}

最佳SVM参数组合: {'C': 0.1, 'degree': 2, 'gamma': 'scale', 'kernel': 'linear'}

最佳ANN参数组合: {'activation': 'logistic', 'hidden_layer_sizes': (100,)}
