# Supplementary material for: A Machine Learning-Based Model for Predicting Rhabdomyolysis in Patients With Sepsis
Source: Research Square preprint supplement (doi:10.21203/rs.3.rs-7904814/v1), 2025-12-10
Supplement: Supplementary file 2 [file f9f2f63b7adf107a9780c8ce.xlsx]

## Sheet: Sheet1
先单后多	lasso	boruta	Common elements in 1 2 3 :
Gender	Gender	Gender	Gender
Severe_liver_disease	Severe_liver_disease	Severe_liver_disease	Severe_liver_disease
Malignant_cancer	Peripheral_vascular_disease	Malignant_cancer	InvasiveVent
AKI	InvasiveVent	InvasiveVent	CPR
InvasiveVent	CPR	CPR	Alb
CPR	CRRT	CRRT	Aniongap
Age	Weight	Age	AST
Los_hospital	SOFA	Los_hospital	CK.CKMB
RDW	Temperature	Los_icu	LDH
Alb	MBP	Weight	P
BUN	MCHC	BMI
Aniongap	Alb	Apsiii
ALT	Aniongap	SOFA
AST	AST	LODS
ALP	CK.CKMB	Charlson
Bilirubin_tota	LDH	MELD
CK.CKMB	Chloride	Temperature
LDH	Hemoglobin	SBP
Bicarbonate	K	MBP
Ca	Mg	Hematocrit
P	P	MCH
	Input_all_sum	MCHC
		RDW
		PLT
		RBC
		Alb
		Creatinine
		BUN
		Aniongap
		PT
		INR
		ALT
		AST
		ALP
		Bilirubin_tota
		CK.CKMB
		LDH
		Chloride
		Glucose
		Bicarbonate
		Hemoglobin
		Ca
		K
		Na
		Mg
		P
		Input_all_sum
		Output_all_sum
		Output_urine_sum
		Fluid_24H
